# Supplementary material for: Trigger-helix folding pathway and SI3 mediate catalysis and hairpin-stabilized pausing by Escherichia coli RNA polymerase
Source: PubMed Central journal article supplement — Nucleic Acids Res. 2014 Oct 21;42(20):12707–21. doi: 10.1093/nar/gku997 (PMC4227799; doi:10.1093/nar/gku997), 2014-10-21
Supplement: supp_gku997_nar-02324-h-2014-File011.pdf [file supp_gku997_nar-02324-h-2014-File011.pdf]

Supplemental Information for:

**Trigger-helix folding pathway and SI3 mediate catalysis and hairpin-stabilized pausing by *Escherichia coli* RNA polymerase**

Tricia A. Windgassen,<sup>1</sup> Rachel Anne Mooney,<sup>1</sup> Dhananjaya Nayak,<sup>1</sup> Murali Palangat,<sup>1</sup> Jinwei Zhang<sup>1</sup> and Robert Landick<sup>1,2\*</sup>

From the Departments of Biochemistry<sup>1</sup> and Bacteriology<sup>2</sup>,  
University of Wisconsin – Madison, Madison, WI 53706, USA

\*To whom correspondence should be addressed. Fax: 608-262-9865; Email:  
landick@biochem.wisc.edu

Supplemental information:

Figure S1. Elongation by wild-type, F937-736, and 6Ala RNAPs

Figure S2. Exonuclease digestion of ECs formed with wild-type and F937-736 RNAPs

Figure S3.  $\Delta$ SI3a and  $\Delta$ SI3b show increased elongation rate on longer templates.

Figure S4. Test of wild-type and PGPP RNAPs for possible misincorporation.

Table S1. Strains, plasmids, and oligonucleotides

Table S2. Nucleotide addition rate measurements

Table S3. Kinetics of pausing at the *his* pause signal

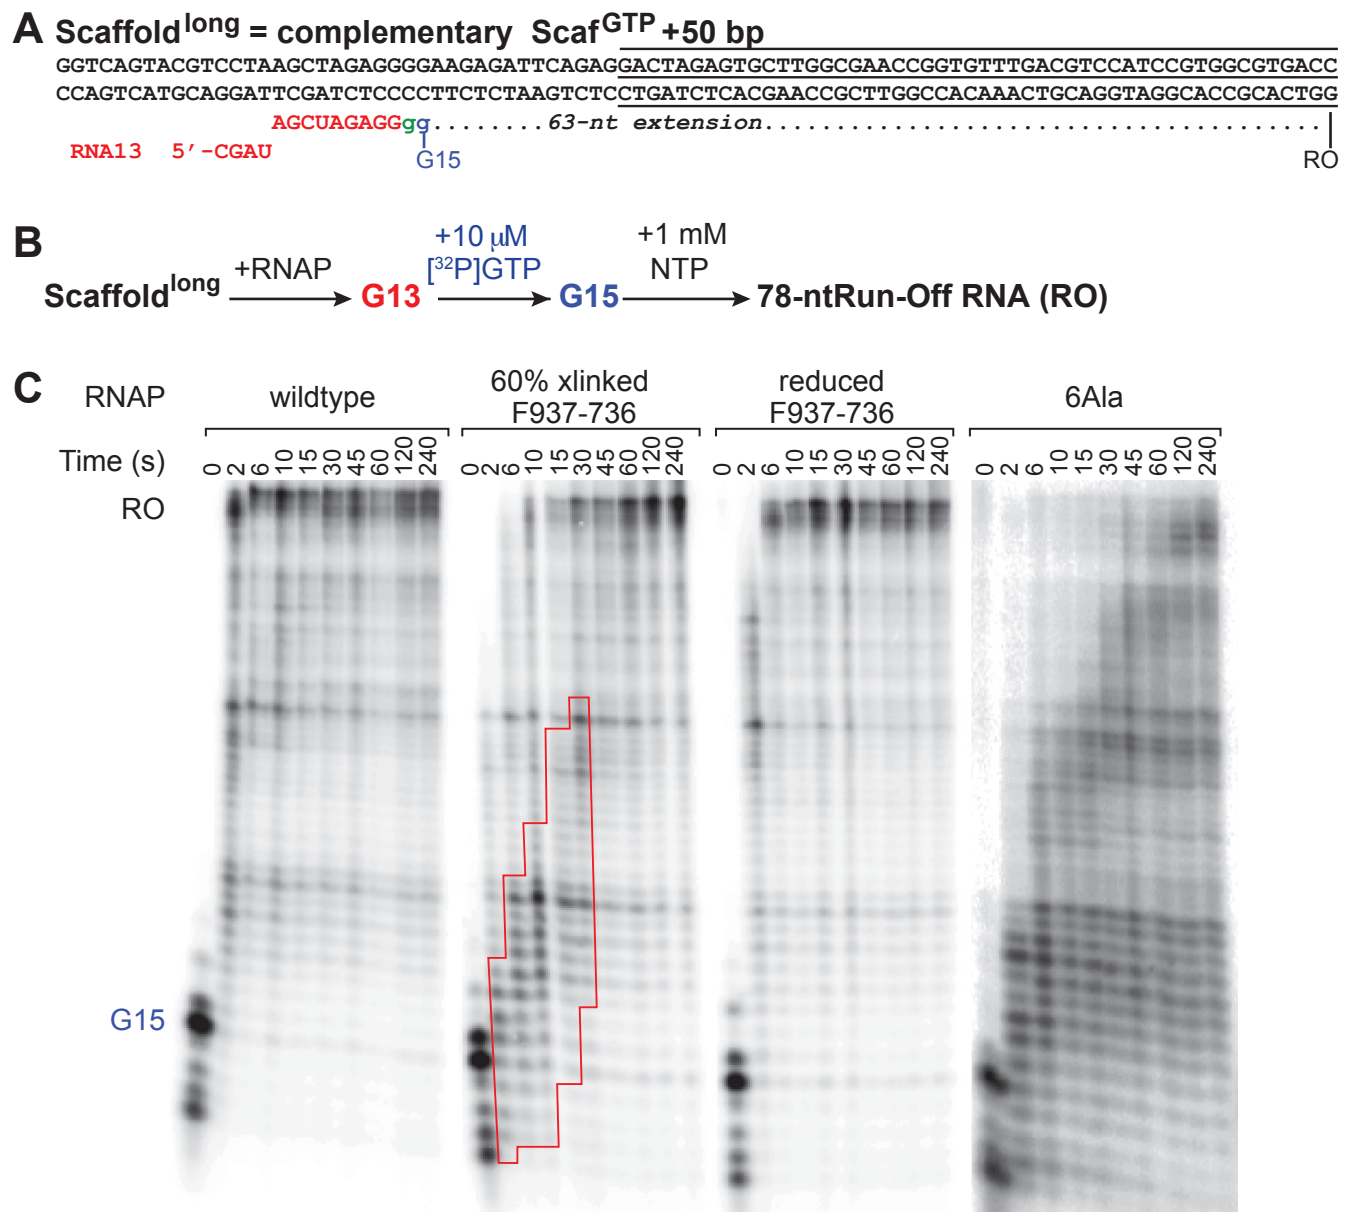

Fig. S1. Elongation by wild-type, F937-736, and 6Ala RNAPs

(A) Schematic of Scaffold<sup>Long</sup>, a derivative of Scaffold<sup>GTP</sup> with additional downstream DNA (42 basepairs) and a fully complementary NT strand.

(B) Schematic of reaction. RNAPs were reconstituted at G13, elongated to G15 with addition of 10 $\mu$ M <sup>32</sup>P-GTP, and given 1 mM all four NTPs at time zero.

(C) Reaction products were halted at the times indicated and separated by denaturing polyacrylamide electrophoresis. The red boxes indicate the apparent products from the crosslinked F937-736 RNAP.

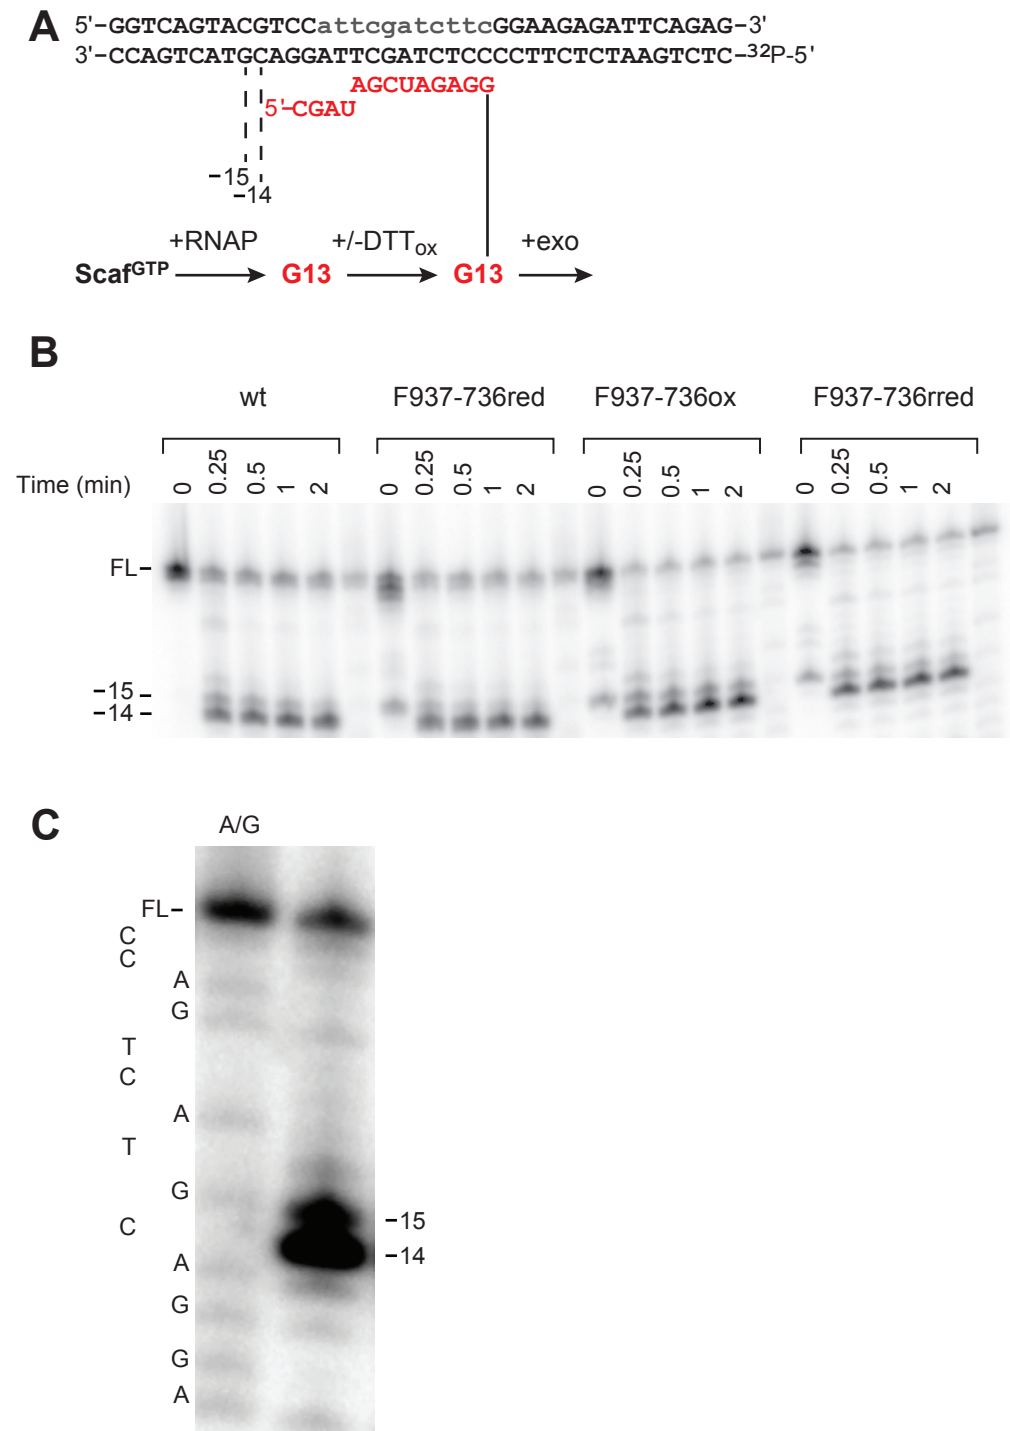

Fig. S2. Exonuclease digestion of ECs formed with wild-type and F937-736 RNAPs.  
 (A) Schematic of exonuclease assay. After reconstitution of complexes and crosslinking, exonuclease is added at time zero, with samples removed during digestion.  
 (B) Samples separated on 20% PAGE, time points as indicated.  
 (C) Mapping of cleavage products by separation alongside an A/G marker.

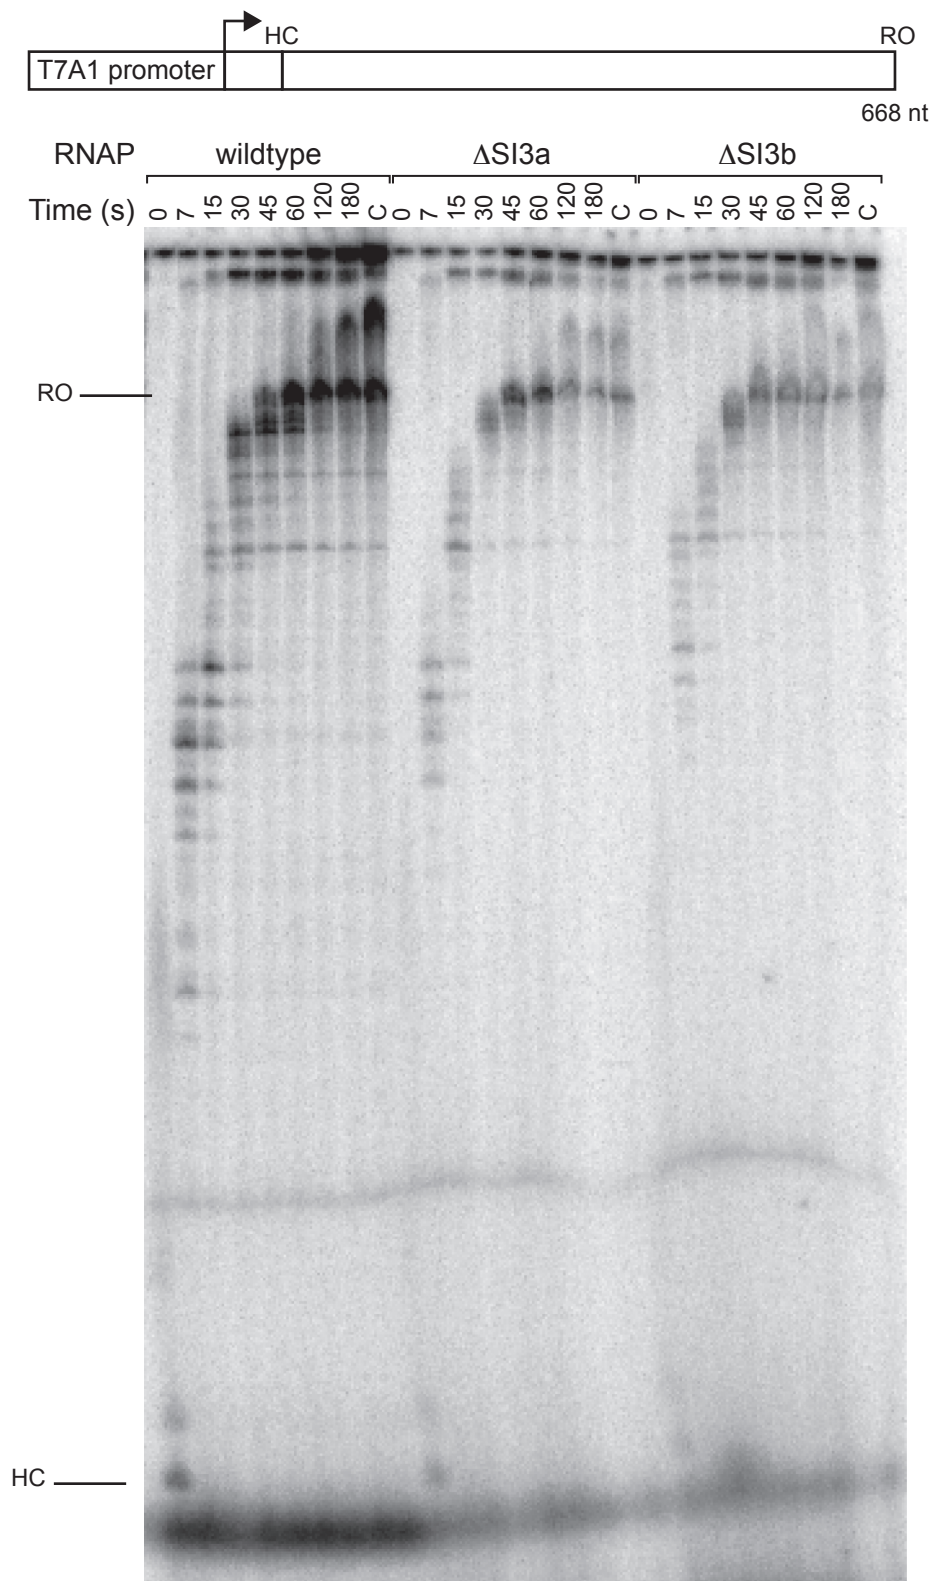

Fig. S3.  $\Delta SI3a$  and  $\Delta SI3b$  show increased elongation rate on longer templates. Top. Schematic of promoter-driven template containing a large fragment of *rpoB* to allow transcription of a 668-nt transcript (pIA146; Table S1).

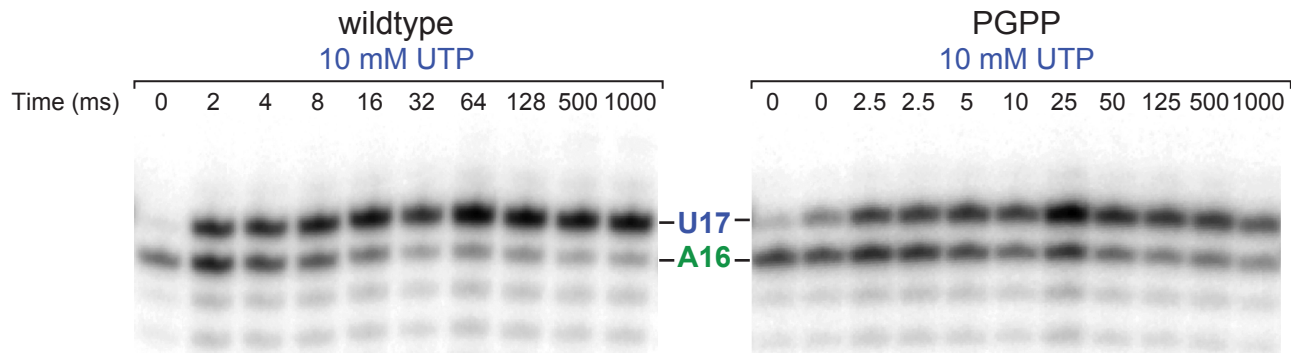

Fig. S4. Test of wild-type and PGPP RNAPs for possible misincorporation. Transcription reactions with wild-type or PGPP RNAPs were performed on ScaffoldGTP, as in Figure 4. Reactions were incubated with 10 mM of both ATP and UTP up to 1 second but no extension beyond U17 (to misincorporate a G) was detected. Thus, we see no evidence for purine-for-purine misincorporation.

Table S1. Strains, Plasmids, and Oligonucleotides

| Stock #         | Name    | Description                                                                                                                                                   | Source or Note      |
|-----------------|---------|---------------------------------------------------------------------------------------------------------------------------------------------------------------|---------------------|
| <b>Strains</b>  |         |                                                                                                                                                               |                     |
| 1607            | DH10b   | <i>F- mcrAΔ(mrr-hsdRMS-mcrBC) φ80 lacZΔM15 ΔlacX74 deoR recA1 araD139D(araA-leu)7697 galU galK rpsL endA1 nupG</i>                                            | (Ref. 1)            |
|                 | C2566   | C2566,T7 Express. <i>fhuA2 lacZ::T7 gene1 [lon] ompT gal sulA11 R(mcr-73::miniTn10--TetS)2 [dcm] R(zgb-210::Tn10--TetS) endA1 Δ(mcrC-mrr)114::IS10. recA-</i> | New England Biolabs |
| 2657            | RL2657  | <i>recA</i> derivative of C2566                                                                                                                               | This work           |
| <b>Plasmids</b> |         |                                                                                                                                                               |                     |
| 2956            | pRM756  | Expresses wild-type <i>E. coli</i> RNAP ( $\alpha_2\beta\beta'\omega$ ) with His <sub>10</sub> tag on the $\beta'$ C-terminus                                 | This work           |
| 2995            | pRM795  | Expresses wild-type <i>E. coli</i> RNAP ( $\alpha_2\beta\beta'\omega$ ) with His <sub>10</sub> and HMK tags on the $\beta'$ C-terminus                        | (Ref. 2)            |
| 4963            | pDJ124  | pRM795 derivative that expresses mutant <i>E. coli</i> RNAP ( $\alpha_2\beta\beta'\omega$ ) containing $\beta'$ I937C Q736C                                   | (Ref. 2)            |
| 4291            | pMTF028 | pRM756 derivative that expresses mutant <i>E. coli</i> RNAP ( $\alpha_2\beta\beta'\omega$ ) containing $\beta'$ G1136P, G1137P (GGPP)                         | This work           |
| 4954            | pDJ115  | pRM795 derivative that expresses mutant <i>E. coli</i> RNAP ( $\alpha_2\beta\beta'\omega$ ) containing $\beta'$ I937C P1139C                                  | (Ref. 2)            |
| 2961            | pRM761  | pRM756 derivative that expresses mutant <i>E. coli</i> RNAP ( $\alpha_2\beta\beta'\omega$ ) containing $\beta'$ L930P, T931P (LTPP)                           | This work           |
| 5126            | pRM826  | pRM795 derivative that expresses mutant <i>E. coli</i> RNAP ( $\alpha_2\beta\beta'\omega$ ) containing $\beta'$ (KDPP)                                        | This work           |
| 5127            | pRM827  | pRM795 derivative that expresses mutant <i>E. coli</i> RNAP ( $\alpha_2\beta\beta'\omega$ ) containing $\beta'$ (DIPP)                                        | This work           |
| 5132            | pRM832  | pRM795 derivative that expresses mutant <i>E. coli</i> RNAP ( $\alpha_2\beta\beta'\omega$ ) containing $\beta'$ (PGPP)                                        | This work           |

|      |         |                                                                                                                                                                              |                        |
|------|---------|------------------------------------------------------------------------------------------------------------------------------------------------------------------------------|------------------------|
| 2959 | pRM759  | pRM756 derivative that expresses mutant <i>E. coli</i> RNAP ( $\alpha_2\beta\beta'\omega$ ) containing $\beta'$ $\Delta$ 943-1130 ( $\Delta$ SI3a)                           | (This work and Ref. 3) |
| 2993 | pRM793  | pRM756 derivative that expresses mutant <i>E. coli</i> RNAP ( $\alpha_2\beta\beta'\omega$ ) containing $\beta'$ $\Delta$ 945-1132 ( $\Delta$ SI3b)                           | (This work and Ref. 4) |
| 5140 | pRM840  | pRM795 derivative that expresses mutant <i>E. coli</i> RNAP ( $\alpha_2\beta\beta'\omega$ ) containing $\beta'$ (DIPP) $\Delta$ 945-1132 ( $\Delta$ SI3b)                    | This work              |
| 5154 | pRM854  | pRM795 derivative that expresses mutant <i>E. coli</i> RNAP ( $\alpha_2\beta\beta'\omega$ ) containing $\beta'$ L930P, T931P (LTPP) 937C 736C                                | This work              |
| 5144 | pRM844  | pRM795 derivative that expresses mutant <i>E. coli</i> RNAP ( $\alpha_2\beta\beta'\omega$ ) containing $\beta'$ (DIPP) 937C 736C                                             | This work              |
| 4967 | pDJ128  | pRM795 derivative that expresses mutant <i>E. coli</i> RNAP ( $\alpha_2\beta\beta'\omega$ ) containing $\beta'$ 937C 736C $\Delta$ 945-1132 ( $\Delta$ SI3b)                 | This work              |
| 5162 | pRM862  | pRM795 derivative that expresses mutant <i>E. coli</i> RNAP ( $\alpha_2\beta\beta'\omega$ ) containing $\beta'$ (DIPP) $\Delta$ 945-1132 ( $\Delta$ SI3b) 937C 736C          | This work              |
| 5155 | pRM855  | pRM795 derivative that expresses mutant <i>E. coli</i> RNAP ( $\alpha_2\beta\beta'\omega$ ) containing $\beta'$ (LTPP) $\Delta$ 945-1132 ( $\Delta$ SI3b) 937C 736C          | This work              |
| 4288 | pMTF025 | pRM756 derivative that expresses mutant <i>E. coli</i> RNAP ( $\alpha_2\beta\beta'\omega$ ) containing $\beta'$ 6Ala (924A, 926A, 927A, 11336A, 1137A, 1139A)                | This work              |
| 5226 | pRM926  | pRM795 derivative that expresses mutant <i>E. coli</i> RNAP ( $\alpha_2\beta\beta'\omega$ ) containing $\beta'$ 6Ala 937C 736C $\Delta$ 945-1132 ( $\Delta$ SI3b)            | This work              |
| 5227 | pRM927  | pRM795 derivative that expresses mutant <i>E. coli</i> RNAP ( $\alpha_2\beta\beta'\omega$ ) containing $\beta'$ 6Ala 937C 736C                                               | This work              |
| 2996 | pRM796  | pRM795 derivative that expresses mutant <i>E. coli</i> RNAP ( $\alpha_2\beta\beta'\omega$ ) containing $\beta'$ 6Ala $\Delta$ 945-1132 ( $\Delta$ SI3b)                      | This work              |
| 5225 | pRM925  | pRM795 derivative that expresses mutant <i>E. coli</i> RNAP ( $\alpha_2\beta\beta'\omega$ ) containing $\beta'$ 6Ala 937C 1139C (924A, 926A, 927A, 11336A, 1137A, but 1139C) | This work              |
| 3737 | pIA423  | Expresses wild-type <i>E. coli</i> RNAP ( $\alpha_2\beta\beta'$ ) with CBP/intein                                                                                            | (Ref. 3)               |

|                                 |                                                             |                                                                                                                                                                                                       |                        |
|---------------------------------|-------------------------------------------------------------|-------------------------------------------------------------------------------------------------------------------------------------------------------------------------------------------------------|------------------------|
|                                 |                                                             | on the $\beta'$ C-terminus                                                                                                                                                                            |                        |
| 3798                            | pIA373                                                      | pIA423 derivative that expresses mutant <i>E. coli</i> RNAP ( $\alpha_2\beta\beta'$ $\Delta$ 1149-1190; $\Delta$ jaw) with CBP/intein on the $\beta'$ C-terminus                                      | (Ref. 5)               |
| 47512                           | pJZ1                                                        | pIA423 derivative that expresses mutant <i>E. coli</i> RNAP ( $\alpha_2\beta\beta'$ $\Delta$ 1149-1190, $\Delta$ jaw and $\Delta$ 943-1130, $\Delta$ SI3a) with CBP/intein on the $\beta'$ C-terminus | (This work and Ref. 3) |
| 761                             | pIA146                                                      | pT7A1-668nt template plasmid                                                                                                                                                                          | (Ref. 5)               |
| 775                             | pIA171                                                      | pT7A1- <i>his</i> P template plasmid                                                                                                                                                                  | (Ref. 5)               |
| 3774                            | pIA349                                                      | pT7A1-ops P- <i>his</i> P - <i>his</i> T template plasmid                                                                                                                                             | (Ref. 6)               |
| <b>Oligonucleotides (5'→3')</b> |                                                             |                                                                                                                                                                                                       |                        |
| 5069                            | NT, Scaffold <sup>PEC</sup> and Scaffold <sup>UTP</sup>     | GGTCAGTACGTCCATTTCGATCTTCGGAAGAGATTCAGAG                                                                                                                                                              |                        |
| 5420                            | T, Scaffold <sup>PEC</sup>                                  | CTCTGAATCTCTTCCAGCACACATCAGGACGTACTGACC                                                                                                                                                               |                        |
| 4903                            | T, Scaffold <sup>UTP</sup>                                  | CTCTGAATCTCTTCCCCTCTAGCTTAGGACGTACTGACC                                                                                                                                                               |                        |
| 7636                            | RNA13, Scaffold <sup>GTP</sup> and Scaffold <sup>Long</sup> | CGAUAGCUAGAGG                                                                                                                                                                                         |                        |
| 8079                            | RNA13 (EC-dG)                                               | CGAUAGCUAGAG3'dG                                                                                                                                                                                      |                        |
| 4865                            | RNA29, Scaffold <sup>PEC</sup>                              | CCUGACUAGUCUUUCAGGCGAUGUGUGCU                                                                                                                                                                         |                        |
| 4867                            | RNA27, Scaffold <sup>PEC</sup>                              | CCUGACUAGUCUUUCAGGCGAUGUGUGCU                                                                                                                                                                         |                        |
| 7712                            | NT, Scaffold <sup>UTP</sup>                                 | GGTCAGTACGTGGCTtcgatcttcTGACAGCAATCAGAGTACC                                                                                                                                                           |                        |
| 7713                            | T, Scaffold <sup>UTP</sup>                                  | GGTACTCTGATTGCTGTACATGCCCGGCTAGCCACGTACTGACC                                                                                                                                                          |                        |
| 7718                            | RNA14, Scaffold <sup>UTP</sup>                              | UUUUUUUAGCCGGG                                                                                                                                                                                        |                        |
| 8576                            | NT, Scaffold <sup>Long</sup>                                | GGTCAGTACGTCCCTAAGCTAGAGGGGAAGAGATTCAGAGGACTAG<br>AGTGCTTGGCGAACC GGTGTTTGACGTCCAGGAATGTCAAATCCGT<br>GGCGTGACC                                                                                        |                        |
| 8493                            | T, Scaffold <sup>Long</sup>                                 | GGTCACGCCACGGATTTGACATTCTGGACGTCAAACACCGGTTTCG                                                                                                                                                        |                        |



|  |  |                                                            |
|--|--|------------------------------------------------------------|
|  |  | CCAAGCACTCTAGTCCTCTGAATCTCTTCCCCTCTAGCTTAGGACG<br>TACTGACC |
|--|--|------------------------------------------------------------|

## References

1. Grant, S.G., Jessee, J., Bloom, F.R. and Hanahan, D. (1990) Differential plasmid rescue from transgenic mouse DNAs into *Escherichia coli* methylation-restriction mutants. *Proc Natl Acad Sci U S A*, 87, 4645-4649.
2. Nayak, D., Voss, M., Windgassen, T., Mooney, R.A. and Landick, R. (2013) Cys-pair reporters detect a constrained trigger loop in a paused RNA polymerase. *Molecular cell*, 50, 882-893.
3. Artsimovitch, I., Svetlov, V., Murakami, K. and Landick, R. (2003) Co-overexpression of *E. coli* RNA polymerase subunits allows isolation and analysis of mutant enzymes lacking lineage-specific sequence insertions. *J. Biol. Chem.*, 278, 12344-12355.
4. Miropolskaya, N., Nikiforov, V., Klimasauskas, S., Artsimovitch, I. and Kulbachinskiy, A. (2010) Modulation of RNA polymerase activity through the trigger loop folding. *Transcription*, 1, 89-94.
5. Ederth, J., Artsimovitch, I., Isaksson, L. and Landick, R. (2002) The downstream DNA jaw of bacterial RNA polymerase facilitates both transcriptional initiation and pausing. *J. Biol. Chem.*, 277, 37456-37463.
6. Artsimovitch, I. and Landick, R. (2002) The transcriptional regulator RfaH stimulates RNA chain synthesis after recruitment to elongation complexes by the exposed nontemplate DNA strand. *Cell*, 109, 193-203.

Table S2. Nucleotide addition rate measurements

| <b>G14 and G15 nucleotide addition rates</b> |                                                                                 |                                                                          |
|----------------------------------------------|---------------------------------------------------------------------------------|--------------------------------------------------------------------------|
| <b>RNAP</b>                                  | <b><math>V_{\max}^{\text{app}}</math> G14 <math>\text{s}^{-1}</math></b>        | <b><math>V_{\max}^{\text{app}}</math> G15 <math>\text{s}^{-1}</math></b> |
| WT                                           | 560 ± 10                                                                        | 170 ± 30                                                                 |
| F937-736ox                                   | 12 ± 1                                                                          | 15 ± 1                                                                   |
| F937-736red                                  | 300 ± 70                                                                        | 240 ± 30                                                                 |
| WTox                                         | 530 ± 120                                                                       | 140 ± 30                                                                 |
| 6Ala                                         | 1.7 ± 0.3                                                                       | 7.3 ± 1.1                                                                |
| LTPP                                         | 0.031 ± 0.006                                                                   | 0.081 ± 0.013                                                            |
| DIPP                                         | 0.36 ± 0.06                                                                     | 0.99 ± 0.18                                                              |
| PGPP                                         | 580 ± 50                                                                        | 26 ± 4                                                                   |
| $\Delta$ SI3                                 | 550 ± 50                                                                        | 88 ± 3                                                                   |
| <b>U17 nucleotide addition rates</b>         |                                                                                 |                                                                          |
| <b>RNAP</b>                                  | <b><math>V_{\max}^{\text{obs}}</math> <math>\text{s}^{-1}</math></b>            | <b><math>k_{\text{UTP}}^{\text{obs}}</math> mM</b>                       |
| WT                                           | 360 ± 100                                                                       | 1.4 ± 0.6                                                                |
| LTPP                                         | 0.008 ± 0.002                                                                   | 1.3 ± 1.0                                                                |
| $\Delta$ TL                                  | 0.008 ± 0.000                                                                   | 2.3 ± 0.1                                                                |
| 6Ala                                         | 0.41 ± 0.06                                                                     | 0.35 ± 0.11                                                              |
| KDPP                                         | 0.32 ± 0.02                                                                     | 0.27 ± 0.04                                                              |
| DIPP                                         | 0.18 ± 0.01                                                                     | 0.17 ± 0.10                                                              |
| GGPP                                         | 0.21 ± 0.01                                                                     | 0.28 ± 0.06                                                              |
| PGPP                                         | 480 ± 50                                                                        | 0.45 ± 0.13                                                              |
| $\Delta$ SI3                                 | 750 ± 70                                                                        | 1.2 ± 0.2                                                                |
| DIPP $\Delta$ SI3                            | 0.61 ± 0.03                                                                     | 0.13 ± 0.02                                                              |
| 6Ala $\Delta$ SI3                            | 0.31 ± 0.02                                                                     | 0.62 ± 0.14                                                              |
| $\Delta$ SI3                                 | 550 ± 50                                                                        | 88 ± 3                                                                   |
| <b>U17 nucleotide addition, 10 mM UTP</b>    |                                                                                 |                                                                          |
| <b>RNAP</b>                                  | <b><math>V_{\max}^{\text{app}}</math> <math>\text{s}^{-1}</math>, 10 mM UTP</b> |                                                                          |
| $\Delta$ SI3a                                | 680 ± 70 ( $V_{\max}^{\text{obs}} = 750 \pm 70 \text{ s}^{-1}$ )                |                                                                          |
| $\Delta$ SI3b                                | 560 ± 100                                                                       |                                                                          |

Table S3. Kinetics of pausing at the *his* pause signal

| <b>A. <i>his</i> pause escape, elongating through the pause</b> |                                                  |                                                                |                                                                    |
|-----------------------------------------------------------------|--------------------------------------------------|----------------------------------------------------------------|--------------------------------------------------------------------|
| <b>RNAP</b>                                                     | <b>Bypass fraction</b>                           | <b>Pause fraction, E</b>                                       | <b>Pause escape rate, <math>k_e</math><br/><math>s^{-1}</math></b> |
| F937-736red                                                     | $0.08 \pm 0.03$                                  | $0.75 \pm 0.01$                                                | $0.010 \pm 0.005$                                                  |
| F937-736ox                                                      | $0.68 \pm 0.10$                                  | $0.21 \pm 0.02$                                                | $0.002 \pm 0.001$                                                  |
| F937-736rred                                                    | $0.10 \pm 0.03$                                  | $0.87 \pm 0.03$                                                | $0.002 \pm 0.001$                                                  |
| <b>B. <i>his</i> pause escape, elongating through the pause</b> |                                                  |                                                                |                                                                    |
| <b>RNAP</b>                                                     | <b>Pause fraction,<br/>E</b>                     | <b>Pause escape rate, <math>k_e</math> <math>s^{-1}</math></b> |                                                                    |
| WT                                                              | $0.75 \pm 0.01$                                  | $0.010 \pm 0.001$                                              |                                                                    |
| $\Delta$ SI3a                                                   | $0.65 \pm 0.09$                                  | $0.016 \pm 0.02$                                               |                                                                    |
| $\Delta$ SI3b                                                   | $0.67 \pm 0.01$                                  | $0.020 \pm 0.04$                                               |                                                                    |
| <b>C. <i>his</i> pause escape, starting at the pause</b>        |                                                  |                                                                |                                                                    |
| <b>RNAP</b>                                                     | <b>Fast escape rate,<br/><math>s^{-1}</math></b> | <b>Pause<br/>fraction, E</b>                                   | <b>Pause escape rate, <math>k_e</math><br/><math>s^{-1}</math></b> |
| WT                                                              | NA                                               | $0.94 \pm 0.02$                                                | $0.015 \pm 0.002$                                                  |
| PGPP                                                            | $0.20 \pm 0.07$                                  | $0.26 \pm 0.03$                                                | $0.025 \pm 0.002$                                                  |
| F773V                                                           | $0.27 \pm 0.01$                                  | $0.24 \pm 0.02$                                                | $0.020 \pm 0.004$                                                  |
